# Supplementary material for: Role of Al-doping with different sites upon the structure and electrochemical performance of spherical LiNi0.5Mn1.5O4 cathode materials for lithium-ion batteries
Source: Royal Society of Chemistry journal article supplement (doi:10.1039/c9ra00374f), 2019-01-01
Supplement: c9ra00374f1.pdf [file c9ra00374f1.pdf]

*Supplementary Information*

**The role of Al-doping with different sites on structure and electrochemical performance of spherical  $\text{LiNi}_{0.5}\text{Mn}_{1.5}\text{O}_4$  cathode materials for lithium-ion battery**

Anyong Chen,<sup>‡</sup> <sup>a</sup> Linglong Kong,<sup>‡</sup> <sup>b,c</sup> Yang Shu,<sup>c</sup> Wenchao Yan,<sup>b,c</sup> Wei Wu,<sup>b,c</sup> Yongji Xu,<sup>\*a</sup> Hongtao Gao<sup>\*a</sup> and Yongcheng Jin<sup>\*b,c</sup>

<sup>a</sup> State Key Laboratory Base of Eco-Chemical Engineering, College of Chemistry and Molecular Engineering, Qingdao University of Science & Technology, Qingdao 266042, China.

<sup>b</sup> Center of Materials Science and Optoelectronics Engineering, University of Chinese Academy of Sciences, Beijing 100049, China.

<sup>c</sup> Qingdao Institute of Bioenergy and Bioprocess Technology, Chinese Academy of Sciences, Qingdao 266101, China.

\*corresponding authors

E-mail address: xuyj1960@126.com (Y. Xu), gaohtao@qust.edu.cn (H. Gao), jinyjc@qibebt.ac.cn (Y. Jin)

<sup>‡</sup> These authors contributed equally to this work.

Table S1 The ICP-AES results of the prepared LNMO samples.

|                                                                                                           | Li   | Ni    | Mn   | Al    |
|-----------------------------------------------------------------------------------------------------------|------|-------|------|-------|
| LiNi <sub>0.5</sub> Mn <sub>1.5</sub> O <sub>4</sub>                                                      | 1.01 | 0.49  | 1.49 | 0.00  |
| Li <sub>0.95</sub> Ni <sub>0.45</sub> Al <sub>0.05</sub> Mn <sub>1.5</sub> O <sub>4</sub>                 | 0.98 | 0.44  | 1.49 | 0.047 |
| <sup>4</sup><br>Li <sub>1.03</sub> Ni <sub>0.5</sub> Al <sub>0.03</sub> Mn <sub>1.47</sub> O <sub>4</sub> | 1.05 | 0.51  | 1.46 | 0.028 |
| <sup>4</sup><br>LiNi <sub>0.475</sub> Al <sub>0.05</sub> Mn <sub>1.475</sub> O <sub>4</sub>               | 1.02 | 0.468 | 1.47 | 0.047 |

Table S2 Lattice parameters of LNMO cathode materials with Al-doping at different sites and various contents.

| Sample                                                                                    | <i>a/nm</i> | <i>V/nm<sup>3</sup></i> | <i>I<sub>111</sub>/I<sub>311</sub></i> |
|-------------------------------------------------------------------------------------------|-------------|-------------------------|----------------------------------------|
| LiNi <sub>0.5</sub> Mn <sub>1.5</sub> O <sub>4</sub>                                      | 0.81715     | 0.54564                 | 2.04                                   |
| Li <sub>0.99</sub> Ni <sub>0.49</sub> Al <sub>0.01</sub> Mn <sub>1.5</sub> O <sub>4</sub> | 0.81697     | 0.54528                 | 2.08                                   |
| Li <sub>0.97</sub> Ni <sub>0.47</sub> Al <sub>0.03</sub> Mn <sub>1.5</sub> O <sub>4</sub> | 0.81693     | 0.54520                 | 2.27                                   |
| Li <sub>0.95</sub> Ni <sub>0.45</sub> Al <sub>0.05</sub> Mn <sub>1.5</sub> O <sub>4</sub> | 0.81684     | 0.54502                 | 2.34                                   |
| Li <sub>0.97</sub> Ni <sub>0.43</sub> Al <sub>0.07</sub> Mn <sub>1.5</sub> O <sub>4</sub> | 0.81675     | 0.54484                 | 2.11                                   |
| Li <sub>1.01</sub> Ni <sub>0.5</sub> Al <sub>0.01</sub> Mn <sub>1.49</sub> O <sub>4</sub> | 0.81679     | 0.54492                 | 2.09                                   |
| Li <sub>1.03</sub> Ni <sub>0.5</sub> Al <sub>0.03</sub> Mn <sub>1.47</sub> O <sub>4</sub> | 0.81681     | 0.54496                 | 2.54                                   |
| Li <sub>1.05</sub> Ni <sub>0.5</sub> Al <sub>0.05</sub> Mn <sub>1.45</sub> O <sub>4</sub> | 0.81682     | 0.54498                 | 2.20                                   |
| Li <sub>1.07</sub> Ni <sub>0.5</sub> Al <sub>0.07</sub> Mn <sub>1.43</sub> O <sub>4</sub> | 0.81686     | 0.54506                 | 2.41                                   |
| LiNi <sub>0.495</sub> Al <sub>0.01</sub> Mn <sub>1.495</sub> O <sub>4</sub>               | 0.81676     | 0.54486                 | 2.04                                   |
| LiNi <sub>0.485</sub> Al <sub>0.03</sub> Mn <sub>1.485</sub> O <sub>4</sub>               | 0.81661     | 0.54456                 | 2.28                                   |
| LiNi <sub>0.475</sub> Al <sub>0.05</sub> Mn <sub>1.475</sub> O <sub>4</sub>               | 0.81652     | 0.54438                 | 2.28                                   |
| LiNi <sub>0.465</sub> Al <sub>0.07</sub> Mn <sub>1.465</sub> O <sub>4</sub>               | 0.81643     | 0.54420                 | 2.18                                   |
| JCPDS (80-2162)                                                                           | 0.817       | 0.54534                 | 2.66                                   |

Table S3 Structural parameters after Rietveld refinements.

| $\text{Li}_{0.95}\text{Ni}_{0.45}\text{Al}_{0.05}\text{Mn}_{1.5}\text{O}_4$                                                                                          |                |       |       |       |       |                |
|----------------------------------------------------------------------------------------------------------------------------------------------------------------------|----------------|-------|-------|-------|-------|----------------|
| ( $\text{Fd}\bar{3}\text{m}$ , $a = b = c = 8.1650 \text{ \AA}$ , $\alpha = \beta = \gamma = 90^\circ$ , $\text{Rp}=2.29$ , $\text{GOF}=1.16$ , $\text{wRp}=2.91$ .) |                |       |       |       |       |                |
| Atom                                                                                                                                                                 | Wyckoff symbol | x     | y     | z     | Uiso  | Site occupancy |
| Li1                                                                                                                                                                  | 8a             | 0.500 | 0.500 | 0.500 | 0.042 | 0.886          |
| Li2                                                                                                                                                                  | 16d            | 0.625 | 0.125 | 0.125 | 0.042 | 0.008          |
| Mn1                                                                                                                                                                  | 16d            | 0.625 | 0.125 | 0.125 | 0.003 | 0.750          |
| Al1                                                                                                                                                                  | 16d            | 0.625 | 0.125 | 0.125 | 0.012 | 0.025          |
| Ni1                                                                                                                                                                  | 16d            | 0.625 | 0.125 | 0.125 | 0.003 | 0.217          |
| Ni2                                                                                                                                                                  | 8a             | 0.500 | 0.500 | 0.500 | 0.003 | 0.017          |
| O1                                                                                                                                                                   | 32e            | 0.635 | 0.365 | 0.135 | 0.015 | 1.000          |
| Li2                                                                                                                                                                  | 16d            | 0.625 | 0.125 | 0.125 | 0.042 | 0.008          |
| Mn1                                                                                                                                                                  | 16d            | 0.625 | 0.125 | 0.125 | 0.003 | 0.750          |
| $\text{Li}_{1.03}\text{Ni}_{0.5}\text{Al}_{0.03}\text{Mn}_{1.47}\text{O}_4$                                                                                          |                |       |       |       |       |                |
| ( $\text{Fd}\bar{3}\text{m}$ , $a = b = c = 8.1666 \text{ \AA}$ , $\alpha = \beta = \gamma = 90^\circ$ , $\text{Rp}=2.23$ , $\text{GOF}=1.22$ , $\text{wRp}=2.90$ )  |                |       |       |       |       |                |
| Atom                                                                                                                                                                 | Wyckoff symbol | x     | y     | z     | Uiso  | Site occupancy |
| Li1                                                                                                                                                                  | 8a             | 0.500 | 0.500 | 0.500 | 0.038 | 1.000          |
| Mn1                                                                                                                                                                  | 16d            | 0.625 | 0.125 | 0.125 | 0.009 | 0.735          |
| Al1                                                                                                                                                                  | 16d            | 0.625 | 0.125 | 0.125 | 0.012 | 0.015          |
| Ni1                                                                                                                                                                  | 16d            | 0.625 | 0.125 | 0.125 | 0.009 | 0.250          |
| O1                                                                                                                                                                   | 32e            | 0.638 | 0.362 | 0.138 | 0.010 | 1.000          |
| $\text{LiNi}_{0.475}\text{Al}_{0.05}\text{Mn}_{1.475}\text{O}_4$                                                                                                     |                |       |       |       |       |                |
| ( $\text{Fd}\bar{3}\text{m}$ , $a = b = c = 8.1653 \text{ \AA}$ , $\alpha = \beta = \gamma = 90^\circ$ , $\text{Rp}=2.75$ , $\text{GOF}=1.11$ , $\text{wRp}=3.51$ )  |                |       |       |       |       |                |
| Atom                                                                                                                                                                 | Wyckoff symbol | x     | y     | z     | Uiso  | Site occupancy |
| Li1                                                                                                                                                                  | 8a             | 0.250 | 0.250 | 0.250 | 0.053 | 0.968          |
| Li2                                                                                                                                                                  | 16d            | 0.625 | 0.125 | 0.125 | 0.053 | 0.016          |
| Mn1                                                                                                                                                                  | 16d            | 0.625 | 0.125 | 0.125 | 0.007 | 0.738          |
| Al1                                                                                                                                                                  | 16d            | 0.625 | 0.125 | 0.125 | 0.012 | 0.025          |
| Ni1                                                                                                                                                                  | 16d            | 0.625 | 0.125 | 0.125 | 0.007 | 0.221          |
| Ni2                                                                                                                                                                  | 8a             | 0.250 | 0.250 | 0.250 | 0.007 | 0.032          |
| O1                                                                                                                                                                   | 32e            | 0.635 | 0.135 | 0.365 | 0.015 | 1.000          |

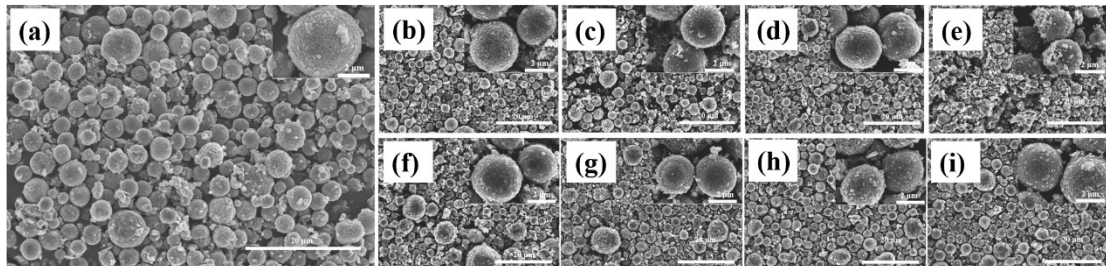

Fig. S1 SEM images of (a)  $\text{LiNi}_{0.5}\text{Mn}_{1.5}\text{O}_4$ , (b-e)  $\text{Li}_{1-x}\text{Ni}_{0.5-x}\text{Al}_x\text{Mn}_{1.5}\text{O}_4$  ( $x=0.01, 0.03, 0.05$  and  $0.07$ ), and (f-i)  $\text{Li}_{1+x}\text{Ni}_{0.5}\text{Al}_x\text{Mn}_{1.5-x}\text{O}_4$  ( $x=0.01, 0.03, 0.05$  and  $0.07$ ). The scale bar for the larger graphs is  $20\ \mu\text{m}$ , and the scale bar for the inserted graphs is  $2\ \mu\text{m}$ .

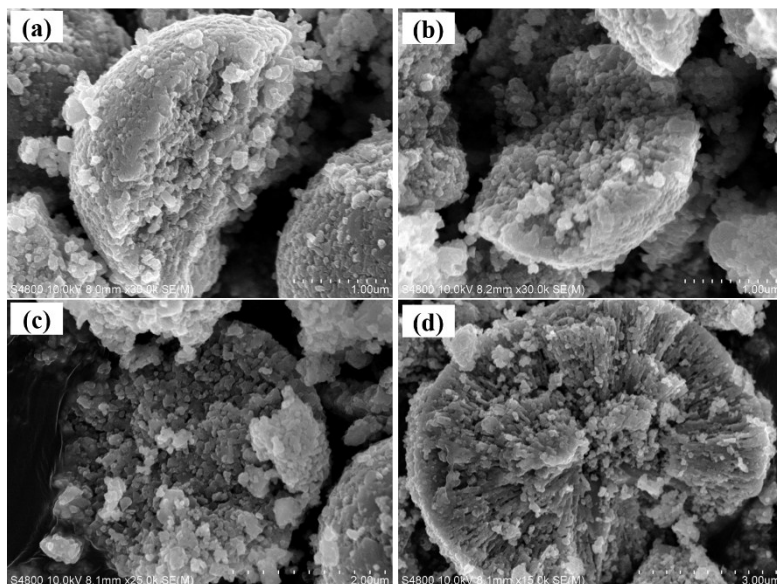

Fig. S2 Cross-sectional images of (a)  $\text{LiNi}_{0.495}\text{Al}_{0.01}\text{Mn}_{1.495}\text{O}_4$  ( $x=0.01$ ), (b)  $\text{LiNi}_{0.485}\text{Al}_{0.03}\text{Mn}_{1.485}\text{O}_4$  ( $x=0.03$ ), (c)  $\text{LiNi}_{0.475}\text{Al}_{0.05}\text{Mn}_{1.475}\text{O}_4$  ( $x=0.05$ ), and (d)  $\text{LiNi}_{0.465}\text{Al}_{0.05}\text{Mn}_{1.465}\text{O}_4$  ( $x=0.07$ )

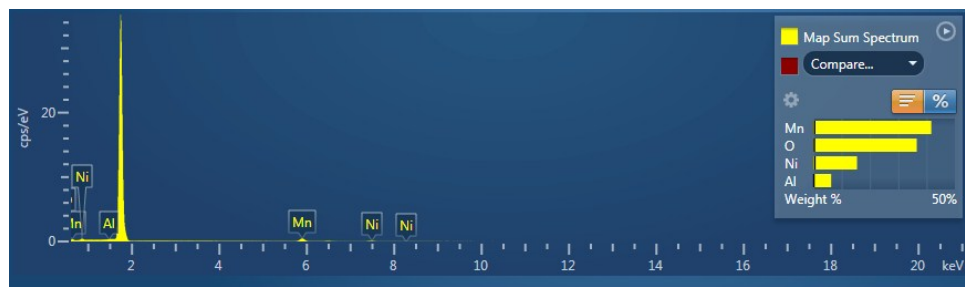

Fig. S3 Elemental map of  $\text{LiNi}_{0.475}\text{Al}_{0.05}\text{Mn}_{1.475}\text{O}_4$  ( $x=0.05$ ).

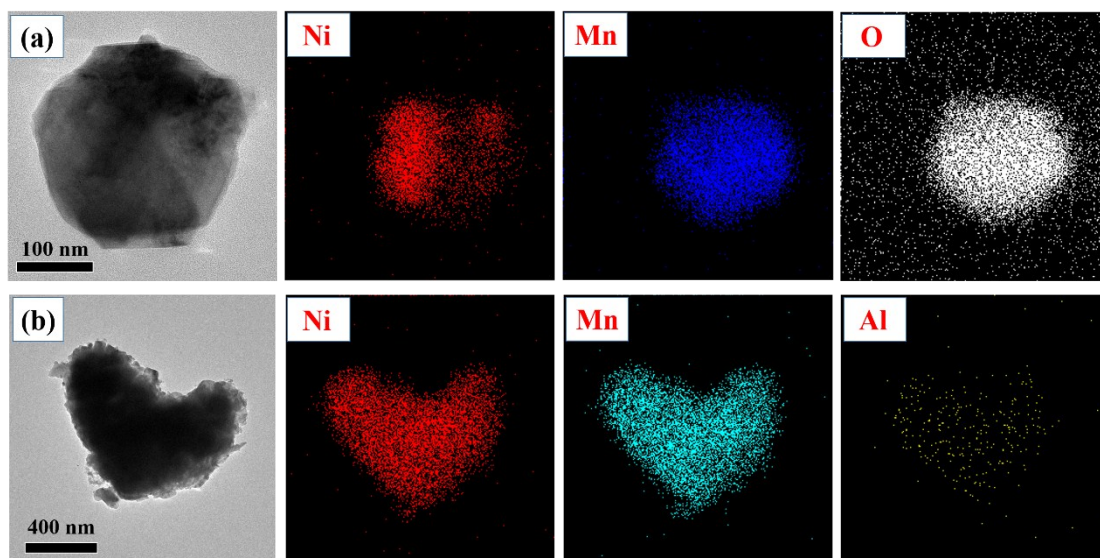

Fig. S4 TEM images of (a)  $\text{LiNi}_{0.5}\text{Mn}_{1.5}\text{O}_4$  and (b)  $\text{LiNi}_{0.475}\text{Al}_{0.05}\text{Mn}_{1.475}\text{O}_4$  combined with relevant elemental mappings of Ni, Mn, O, and Al.

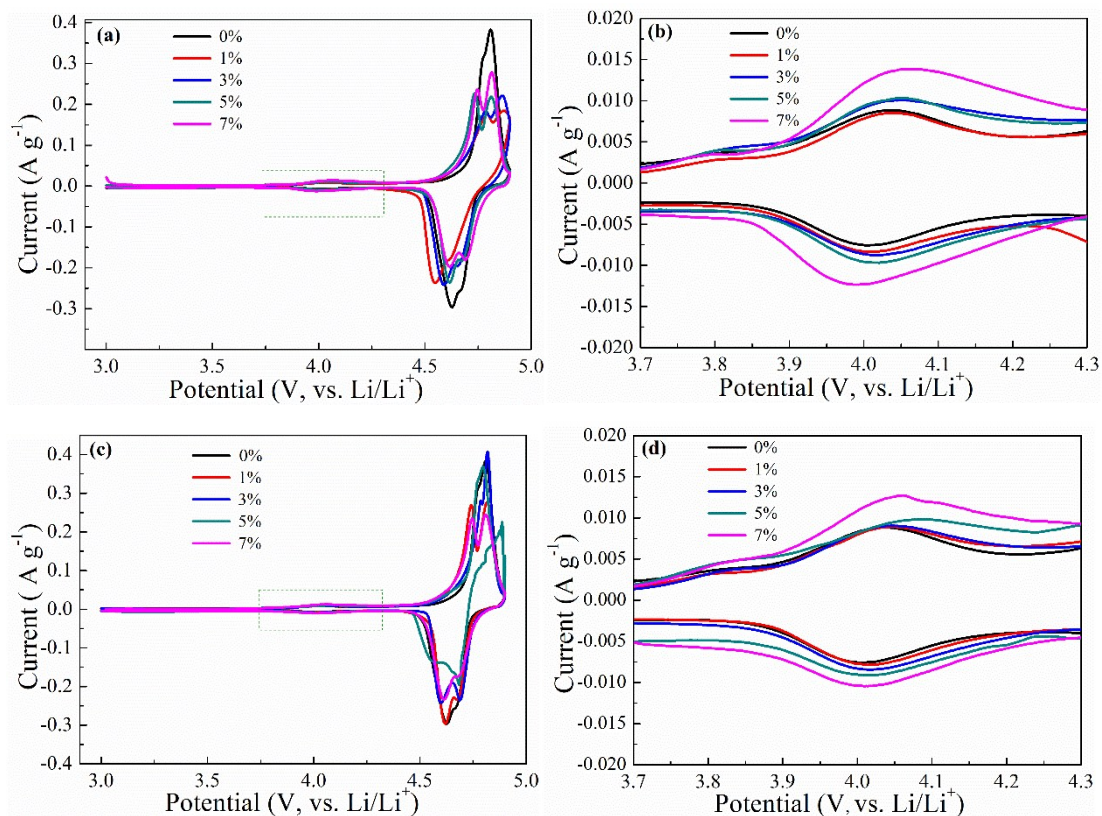

Fig. S5 Cyclic voltammetry curves of  $\text{Li}_{1-x}\text{Ni}_{0.5-x}\text{Al}_x\text{Mn}_{1.5}\text{O}_4$  ( $x=0, 0.01, 0.03, 0.05,$  and  $0.07$ ) (a) and  $\text{Li}_{1+x}\text{Ni}_{0.5}\text{Al}_x\text{Mn}_{1.5-x}\text{O}_4$  ( $x=0, 0.01, 0.03, 0.05,$  and  $0.07$ ) (c) combined with the relevant enlarged area (b) and (d) in the potential intervals of  $3.7\sim 4.3$  V (vs.  $\text{Li/Li}^+$ ).

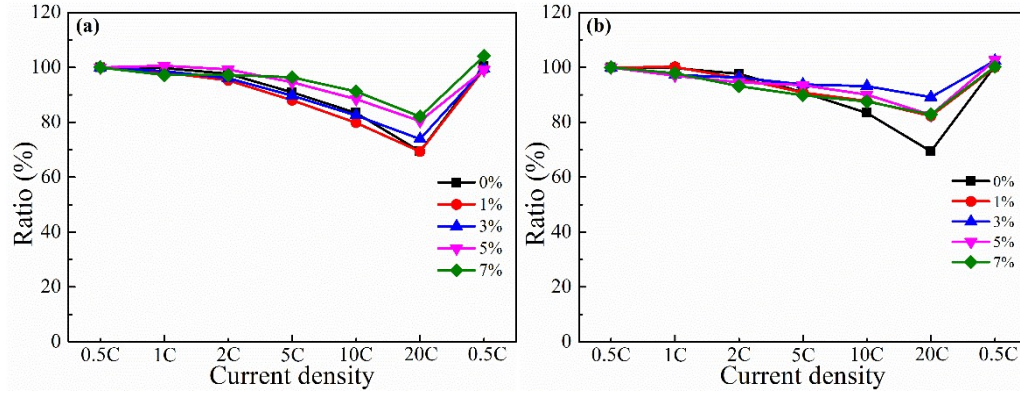

Fig. S6 Capacity ratios of (a)  $\text{Li}_{1-x}\text{Ni}_{0.5-x}\text{Al}_x\text{Mn}_{1.5}\text{O}_4$  and (b)  $\text{Li}_{1+x}\text{Ni}_{0.5}\text{Al}_x\text{Mn}_{1.5-x}\text{O}_4$  ( $x=0, 0.01, 0.03, 0.05, \text{ and } 0.07$ ) at various current densities (0.5 C, 1C, 2C, 5C, 10C and 20C).

Table S4 The specific capacities and capacity ratios of  $\text{Li}_{1-x}\text{Ni}_{0.5-x}\text{Al}_x\text{Mn}_{1.5}\text{O}_4$ ,  $\text{Li}_{1+x}\text{Ni}_{0.5}\text{Al}_x\text{Mn}_{1.5-x}\text{O}_4$ , and  $\text{LiNi}_{0.5-x/2}\text{Al}_x\text{Mn}_{1.5-x/2}\text{O}_4$  ( $x=0, 0.01, 0.03, 0.05 \text{ and } 0.07$ ) at 55 °C (0.5C).

| Sample                                                                      | 1 <sup>st</sup> cycle<br>(mAh g <sup>-1</sup> ) | 50 <sup>th</sup> cycle<br>(mAh g <sup>-1</sup> ) | Capacity ratio<br>(%) |
|-----------------------------------------------------------------------------|-------------------------------------------------|--------------------------------------------------|-----------------------|
| $\text{LiNi}_{0.5}\text{Mn}_{1.5}\text{O}_4$                                | 131                                             | 57.7                                             | 44.05                 |
| $\text{Li}_{0.99}\text{Ni}_{0.49}\text{Al}_{0.01}\text{Mn}_{1.5}\text{O}_4$ | 127.9                                           | 109.3                                            | 85.46                 |
| $\text{Li}_{0.97}\text{Ni}_{0.47}\text{Al}_{0.03}\text{Mn}_{1.5}\text{O}_4$ | 121.9                                           | 103.2                                            | 84.66                 |
| $\text{Li}_{0.95}\text{Ni}_{0.45}\text{Al}_{0.05}\text{Mn}_{1.5}\text{O}_4$ | 127.8                                           | 115.2                                            | 90.14                 |
| $\text{Li}_{0.97}\text{Ni}_{0.43}\text{Al}_{0.07}\text{Mn}_{1.5}\text{O}_4$ | 119.1                                           | 103.9                                            | 87.24                 |
| $\text{Li}_{1.01}\text{Ni}_{0.5}\text{Al}_{0.01}\text{Mn}_{1.49}\text{O}_4$ | 125.3                                           | 101.3                                            | 80.85                 |
| $\text{Li}_{1.03}\text{Ni}_{0.5}\text{Al}_{0.03}\text{Mn}_{1.47}\text{O}_4$ | 126.8                                           | 112.6                                            | 88.80                 |
| $\text{Li}_{1.05}\text{Ni}_{0.5}\text{Al}_{0.05}\text{Mn}_{1.45}\text{O}_4$ | 129.3                                           | 109                                              | 84.30                 |
| $\text{Li}_{1.07}\text{Ni}_{0.5}\text{Al}_{0.07}\text{Mn}_{1.43}\text{O}_4$ | 121                                             | 102                                              | 84.30                 |
| $\text{LiNi}_{0.495}\text{Al}_{0.01}\text{Mn}_{1.495}\text{O}_4$            | 124.6                                           | 96.3                                             | 77.29                 |
| $\text{LiNi}_{0.485}\text{Al}_{0.03}\text{Mn}_{1.485}\text{O}_4$            | 128.9                                           | 106.8                                            | 82.85                 |
| $\text{LiNi}_{0.475}\text{Al}_{0.05}\text{Mn}_{1.475}\text{O}_4$            | 126                                             | 111.7                                            | 88.65                 |
| $\text{LiNi}_{0.465}\text{Al}_{0.07}\text{Mn}_{1.465}\text{O}_4$            | 126.1                                           | 84.7                                             | 67.17                 |

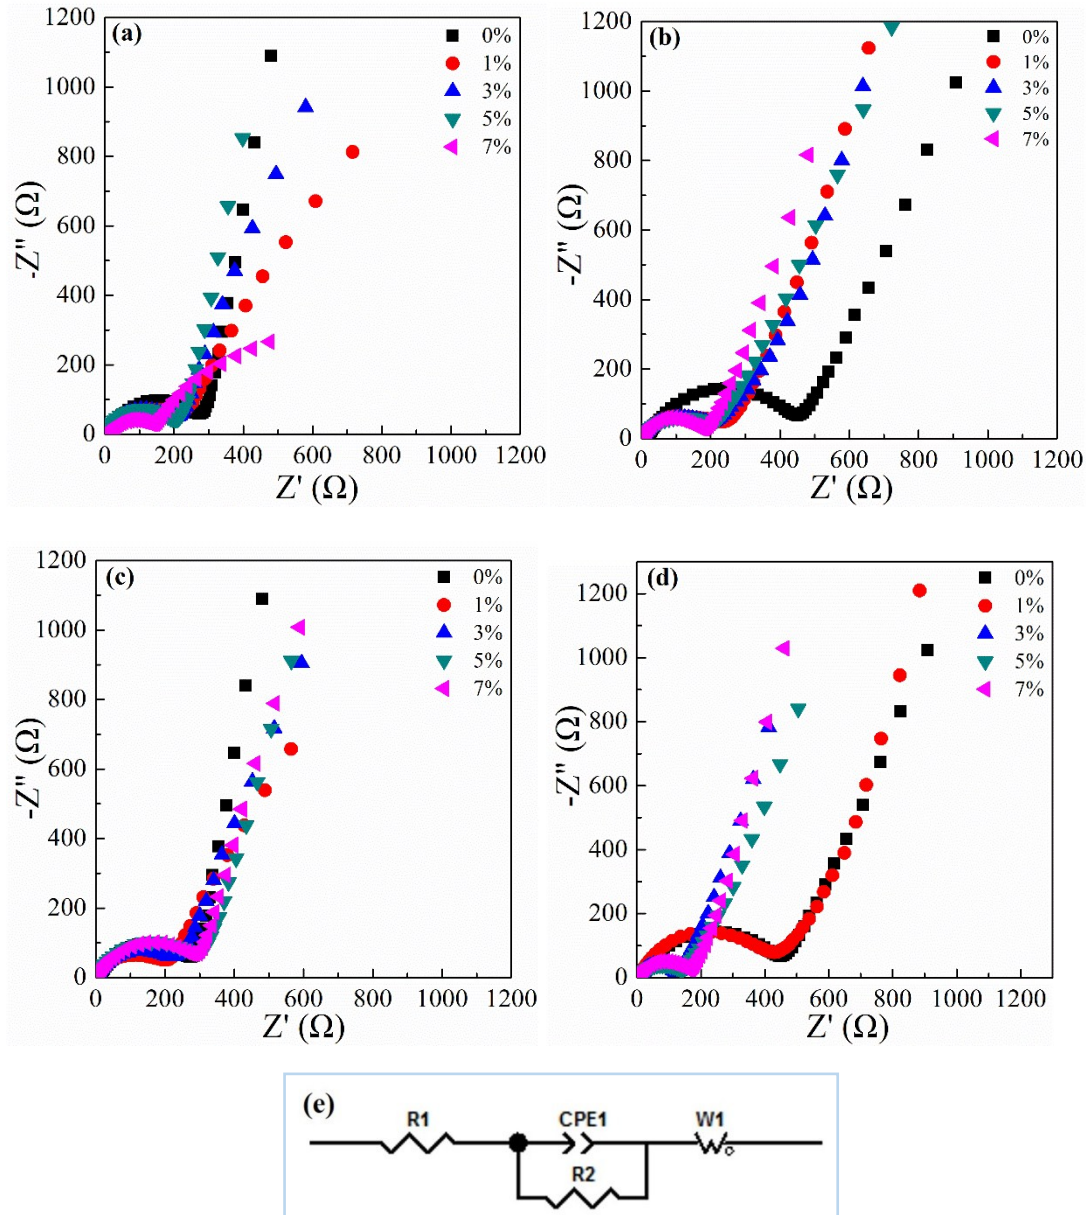

Fig. S7 EIS spectra of (a, b)  $\text{Li}_{1-x}\text{Ni}_{0.5-x}\text{Al}_x\text{Mn}_{1.5}\text{O}_4$  and (c, d)  $\text{Li}_{1+x}\text{Ni}_{0.5}\text{Al}_x\text{Mn}_{1.5-x}\text{O}_4$  ( $x=0, 0.01, 0.03, 0.05$  and  $0.07$ ) before (a, c) and after 200 cycles (b, d) at 0.5C combining with the applied equivalent circuit (e).  $R_1$  refers to the solution resistance,  $R_2$  relates to the charge-transfer resistance,  $CPE_1$  is the constant phase element, and  $W_1$  donates the semi-infinite Warburg diffusion impedance.

Table S5 The stimulated values of  $R_2$  before and after 200 cycles corresponding to the samples of  $\text{Li}_{1-x}\text{Ni}_{0.5-x}\text{Al}_x\text{Mn}_{1.5}\text{O}_4$ ,  $\text{Li}_{1+x}\text{Ni}_{0.5}\text{Al}_x\text{Mn}_{1.5-x}\text{O}_4$ , and  $\text{LiNi}_{0.5-x/2}\text{Al}_x\text{Mn}_{1.5-x/2}\text{O}_4$  ( $x=0, 0.01, 0.03, 0.05$  and  $0.07$ ) utilizing the equivalent circuit.

| Sample                                                                      | $R_2$ -0 <sup>th</sup> cycle<br>( $\Omega$ ) | $R_2$ -200 <sup>th</sup> cycle<br>( $\Omega$ ) | $\Delta R_2$<br>( $\Omega$ ) |
|-----------------------------------------------------------------------------|----------------------------------------------|------------------------------------------------|------------------------------|
| $\text{LiNi}_{0.5}\text{Mn}_{1.5}\text{O}_4$                                | 232.6                                        | 400                                            | 167.4                        |
| $\text{Li}_{0.99}\text{Ni}_{0.49}\text{Al}_{0.01}\text{Mn}_{1.5}\text{O}_4$ | 218.7                                        | 200.3                                          | -18.4                        |
| $\text{Li}_{0.97}\text{Ni}_{0.47}\text{Al}_{0.03}\text{Mn}_{1.5}\text{O}_4$ | 170.8                                        | 160.3                                          | -10.5                        |
| $\text{Li}_{0.95}\text{Ni}_{0.45}\text{Al}_{0.05}\text{Mn}_{1.5}\text{O}_4$ | 175                                          | 158.5                                          | -16.5                        |
| $\text{Li}_{0.97}\text{Ni}_{0.43}\text{Al}_{0.07}\text{Mn}_{1.5}\text{O}_4$ | 105.6                                        | 147.7                                          | 42.1                         |
| $\text{Li}_{1.01}\text{Ni}_{0.5}\text{Al}_{0.01}\text{Mn}_{1.49}\text{O}_4$ | 175.4                                        | 370.1                                          | 194.7                        |
| $\text{Li}_{1.03}\text{Ni}_{0.5}\text{Al}_{0.03}\text{Mn}_{1.47}\text{O}_4$ | 172.4                                        | 107.5                                          | -64.9                        |
| $\text{Li}_{1.05}\text{Ni}_{0.5}\text{Al}_{0.05}\text{Mn}_{1.45}\text{O}_4$ | 250.9                                        | 112.7                                          | -138.2                       |
| $\text{Li}_{1.07}\text{Ni}_{0.5}\text{Al}_{0.07}\text{Mn}_{1.43}\text{O}_4$ | 256.4                                        | 136.3                                          | -120.1                       |
| $\text{LiNi}_{0.495}\text{Al}_{0.01}\text{Mn}_{1.495}\text{O}_4$            | 210.8                                        | 160.2                                          | -50.6                        |
| $\text{LiNi}_{0.485}\text{Al}_{0.03}\text{Mn}_{1.485}\text{O}_4$            | 160.6                                        | 158.4                                          | -2.2                         |
| $\text{LiNi}_{0.475}\text{Al}_{0.05}\text{Mn}_{1.475}\text{O}_4$            | 155                                          | 115.3                                          | -39.7                        |
| $\text{LiNi}_{0.465}\text{Al}_{0.07}\text{Mn}_{1.465}\text{O}_4$            | 135.1                                        | 360.8                                          | 225.7                        |

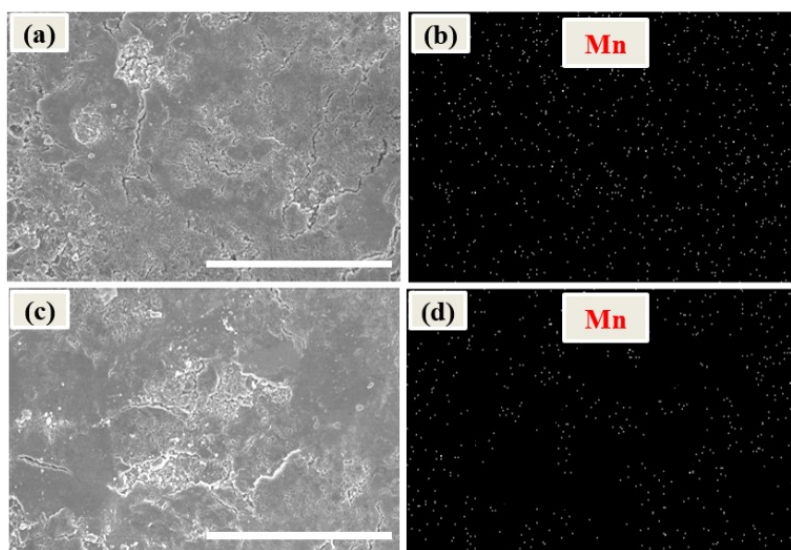

Fig. S8. SEM images of the cycled lithium anode in the  $\text{LiNi}_{0.5}\text{Mn}_{1.5}\text{O}_4$  (a) and (c)  $\text{LiNi}_{0.475}\text{Al}_{0.05}\text{Mn}_{1.475}\text{O}_4$  batteries systems combining with the distribution of Mn in the Li anode surface (b, d). The scale bar for (a) and (c) is 200  $\mu\text{m}$ .



Table S6 The specific content values of Mn on the Li anode referring to  $\text{LiNi}_{0.5}\text{Mn}_{1.5}\text{O}_4$  and  $\text{LiNi}_{0.475}\text{Al}_{0.05}\text{Mn}_{1.475}\text{O}_4$  batteries systems from the EDS.

| <b>Sample</b>                                                    | <b>Mn dissolution content (%)</b> |
|------------------------------------------------------------------|-----------------------------------|
| $\text{LiNi}_{0.5}\text{Mn}_{1.5}\text{O}_4$                     | 0.52                              |
| $\text{LiNi}_{0.475}\text{Al}_{0.05}\text{Mn}_{1.475}\text{O}_4$ | 0.35                              |
